# Supplementary material for: Long-Term Response to Tyrosine Kinase Inhibitors for Metastatic Renal Cell Carcinoma
Source: MDPI journal article supplement (doi:10.3390/biomedicines10102444), 2022-09-30
Supplement: s1 [file s1]

**Table S1:** Best response, according to duration of response to TKI.

|                               | <b>RR, n (%)</b> | <b><i>p</i></b> | <b>DCR, n (%)</b> | <b><i>p</i></b> |
|-------------------------------|------------------|-----------------|-------------------|-----------------|
| <b>All patients</b>           | 124 (37.1)       |                 | 274 (81.8)        |                 |
| PFS $\geq$ 36 months          | 36 (54.5)        | <0.01           | 66 (100)          | <0.01           |
| PFS<36 months                 | 88 (32.7)        |                 | 208 (77.3)        |                 |
| <b>Favorable Risk</b>         | 54 (46.5)        |                 | 106 (91.4)        |                 |
| PFS $\geq$ 36 months          | 19 (61.3)        | 0.05            | 31 (100)          | 0.05            |
| PFS<36 months                 | 35 (41.2)        |                 | 75 (88.2)         |                 |
| <b>Intermediate-poor risk</b> | 70 (32)          |                 | 168 (76.7)        |                 |
| PFS $\geq$ 36 months          | 17 (48.6)        | 0.03            | 35 (100)          | <0.01           |
| PFS<36 months                 | 53 (28.8)        |                 | 133 (72.3)        |                 |

RR: response rate; DCR: disease control rate; *p*: *p* value

**Table S2:** Progression free survival according to duration of response to prior TKI.

| Patients               | mPFS months<br>(95% CI) | Hazard Ratio<br>(95%CI) | <i>p</i> |
|------------------------|-------------------------|-------------------------|----------|
| All patients           | 13 (11-15)              |                         |          |
| PFS≥36 months          | 70 (58-86)              | 0.00 (0)                | <0.01    |
| PFS<36 months          | 10 (8-12)               |                         |          |
| Favorable risk         |                         |                         |          |
| All patients           | 21 (15-31)              |                         |          |
| PFS≥36 months          | 72 (52-86)              | 0.00 (0)                | <0.01    |
| PFS<36 months          | 13 (12-18)              |                         |          |
| Intermediate-poor risk |                         |                         |          |
| All patients           | 11 (9-12)               |                         |          |
| PFS≥36 months          | 67 (55-100)             | 0.00 (0)                | <0.01    |
| PFS<36 months          | 8 (7-10)                |                         |          |

*PFS: progression free survival; CI: confidence interval; NR: not reached; m: median.*

**Table S3:** Overall survival according to duration of response to prior TKI.

| Patients               | mOS months<br>(95% CI) | Hazard Ratio<br>(95%CI) | <i>p</i> |
|------------------------|------------------------|-------------------------|----------|
| All patients           | 48 (39-60)             |                         |          |
| PFS≥36 months          | 106 (93-NR)            | 0.20 (0.12-0.32)        | <0.01    |
| PFS<36 months          | 33 (24-39)             |                         |          |
| Favorable risk         |                        |                         |          |
| All patients           | 75 (63-105)            |                         |          |
| PFS≥36 months          | 105 (70-NR)            | 0.30 (0.14-0.62)        | <0.01    |
| PFS<36 months          | 66 (40-75)             |                         |          |
| Intermediate-poor risk |                        |                         |          |
| All patients           | 33 (24-43)             |                         |          |
| PFS≥36 months          | 112 (93-NR)            | 0.17 (0.09-0.32)        | <0.01    |
| PFS<36 months          | 23 (20-29)             |                         |          |

*OS: overall survival; CI: confidence interval; NR: not reached; m: median.*
